# Supplementary material
Source: Springer Nature journal article supplement (https://www.springermedizin.de/resource/supplementary/13041_2008_26_MOESM4_ESM.pdf/25657438)

## ACC synapse

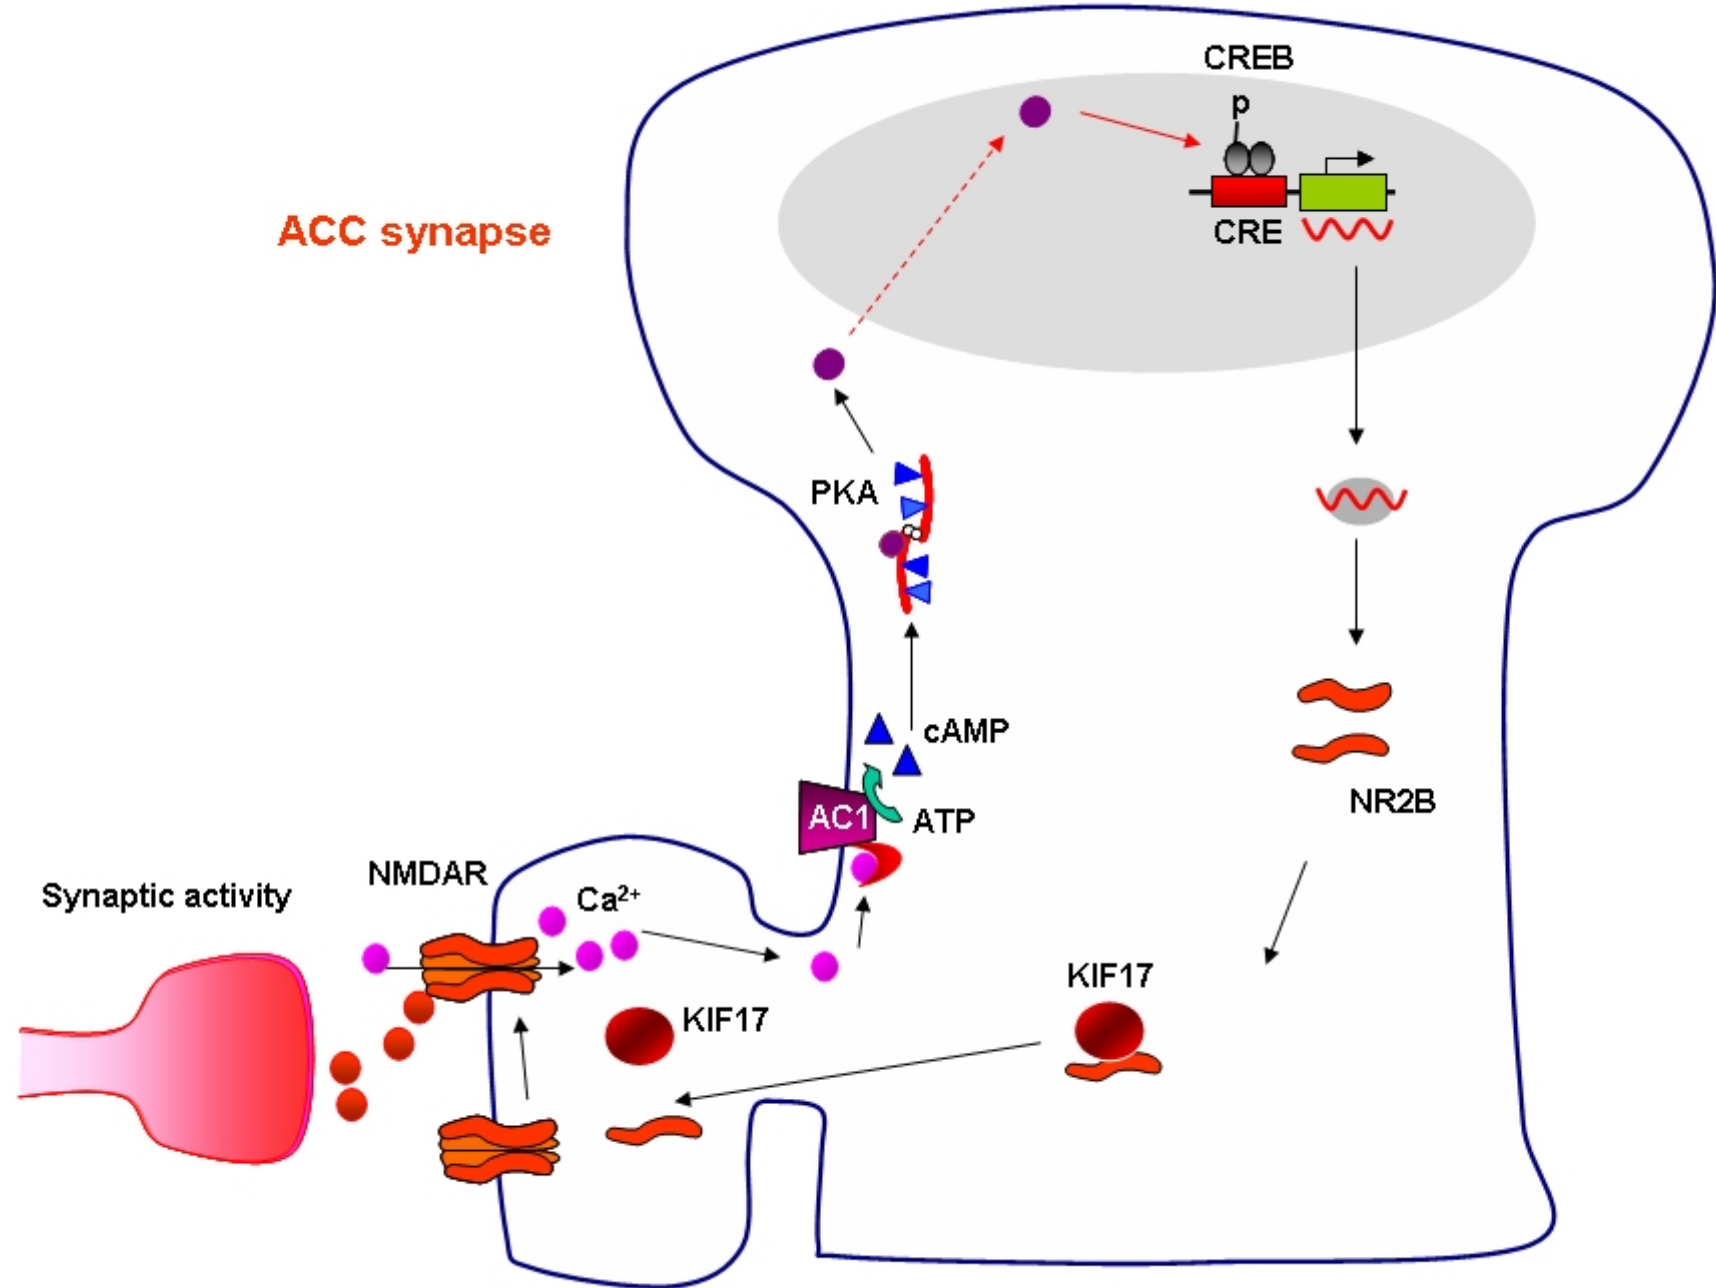

Supplement: MOESM4 [file 25657438]
